# Supplementary material
Source: publisher site journal article supplement (https://www.jstage.jst.go.jp/article/geochemj/46/3/46_2.0202/_supplement/_download/46_2.0202_1.pdf)
Supplement: Supplementary file 1 [file 46_2.0202_1.pdf]

Supplementary table. SHRIMP U–Th–Pb zircon results for the studied rocks.

| Spot                                  | $^{206}\text{Pb}_c$ <sup>1</sup><br>(%) | U<br>(ppm) | Th<br>(ppm) | Th/U | $^{238}\text{U}$ <sup>2</sup><br>/ $^{206}\text{Pb}$ | ±%  | $^{207}\text{Pb}$ <sup>2</sup><br>/ $^{206}\text{Pb}$ | ±%   | $^{206}\text{Pb}/^{238}\text{U}$ <sup>3</sup><br>Age (Ma) |
|---------------------------------------|-----------------------------------------|------------|-------------|------|------------------------------------------------------|-----|-------------------------------------------------------|------|-----------------------------------------------------------|
| <b><i>Diorite xenolith</i></b>        |                                         |            |             |      |                                                      |     |                                                       |      |                                                           |
| 1125-1a_2.1                           | 0.70                                    | 1563       | 1845        | 1.22 | 24.4                                                 | 0.6 | 0.0572                                                | 0.7  | 256.8 ±1.4                                                |
| 1125-1a_3.1                           | 0.16                                    | 1335       | 2283        | 1.77 | 23.6                                                 | 0.6 | 0.0524                                                | 0.7  | 266.9 ±1.5                                                |
| 1125-1a_4.1                           | 0.04                                    | 786        | 71          | 0.09 | 23.9                                                 | 0.9 | 0.0524                                                | 1.1  | 264.3 ±2.4                                                |
| 1125-1a_4.2                           | 0.08                                    | 2880       | 4784        | 1.72 | 23.5                                                 | 0.5 | 0.0519                                                | 0.6  | 269.1 ±1.5                                                |
| 1125-1a_4.3                           | 0.91                                    | 995        | 1158        | 1.20 | 24.5                                                 | 0.9 | 0.0585                                                | 1.0  | 255.6 ±2.2                                                |
| 1125-1a_5.1                           | 0.11                                    | 3114       | 2590        | 0.86 | 24.8                                                 | 0.5 | 0.0517                                                | 0.9  | 254.3 ±1.4                                                |
| 1125-1a_5.2                           | 0.90                                    | 1259       | 1668        | 1.37 | 22.9                                                 | 0.6 | 0.0621                                                | 0.8  | 271.6 ±1.6                                                |
| 1125-1a_6.1                           | 14.57                                   | 394        | 165         | 0.43 | 20.0                                                 | 0.7 | 0.1614                                                | 0.9  | 272.7 ±2.0                                                |
| 1125-1a_6.2                           | 2.86                                    | 2495       | 3568        | 1.48 | 24.2                                                 | 0.6 | 0.0736                                                | 0.5  | 254.3 ±1.4                                                |
| 1125-1a_7.1                           | –                                       | 1245       | 367         | 0.30 | 24.8                                                 | 0.6 | 0.0515                                                | 0.9  | 254.7 ±1.5                                                |
| 1125-1a_8.1                           | 0.01                                    | 3889       | 5559        | 1.48 | 23.5                                                 | 0.6 | 0.0517                                                | 0.5  | 268.4 ±1.5                                                |
| 1125-1a_9.1                           | 0.02                                    | 3687       | 7546        | 2.11 | 24.1                                                 | 0.5 | 0.0521                                                | 0.5  | 262.1 ±1.4                                                |
| 1125-1a_10.1                          | 10.68                                   | 3497       | 7198        | 2.13 | 26.5                                                 | 2.7 | 0.1467                                                | 13.6 | 210.8 ±8.2                                                |
| 1125-1a_10.2                          | 0.14                                    | 1257       | 1330        | 1.09 | 24.4                                                 | 0.6 | 0.0533                                                | 1.0  | 258.3 ±1.5                                                |
| 1125-1a_11.1                          | 1.28                                    | 2087       | 2501        | 1.24 | 28.3                                                 | 0.6 | 0.0682                                                | 1.2  | 218.7 ±1.2                                                |
| 1125-1a_12.1                          | 0.34                                    | 638        | 159         | 0.26 | 26.8                                                 | 0.6 | 0.0546                                                | 1.2  | 235.0 ±1.5                                                |
| 1125-1a_13.1                          | 0.04                                    | 1589       | 2990        | 1.94 | 23.6                                                 | 0.6 | 0.0525                                                | 0.7  | 266.9 ±1.5                                                |
| 1125-1a_13.2                          | 0.43                                    | 938        | 255         | 0.28 | 24.8                                                 | 0.6 | 0.0549                                                | 2.3  | 254.1 ±1.6                                                |
| 1125-1a_14.1                          | 0.00                                    | 3217       | 5205        | 1.67 | 24.0                                                 | 0.7 | 0.0522                                                | 0.5  | 262.9 ±1.7                                                |
| 1125-1a_15.1                          | 0.05                                    | 1570       | 2347        | 1.54 | 23.6                                                 | 1.3 | 0.0515                                                | 0.8  | 267.9 ±3.5                                                |
| 1125-1a_16.1                          | 0.07                                    | 2512       | 3121        | 1.28 | 23.8                                                 | 0.6 | 0.0526                                                | 0.6  | 265.4 ±1.4                                                |
| 1125-1a_17.1                          | 0.15                                    | 890        | 179         | 0.21 | 24.5                                                 | 0.9 | 0.0525                                                | 1.1  | 257.3 ±2.2                                                |
| 1125-1a_17.2                          | 0.09                                    | 2125       | 662         | 0.32 | 24.4                                                 | 0.7 | 0.0519                                                | 0.7  | 258.9 ±1.7                                                |
| 1125-1a_18.1                          | 0.19                                    | 2120       | 324         | 0.16 | 24.7                                                 | 0.6 | 0.0546                                                | 0.7  | 254.9 ±1.4                                                |
| 1125-1a_19.1                          | 1.07                                    | 1871       | 742         | 0.41 | 26.2                                                 | 0.7 | 0.0665                                                | 1.2  | 236.7 ±1.6                                                |
| 1125-1a_20.1                          | 0.06                                    | 2941       | 4155        | 1.46 | 23.8                                                 | 1.1 | 0.0525                                                | 0.6  | 265.5 ±3.0                                                |
| 1125-1a_21.1                          | 0.27                                    | 2529       | 4765        | 1.95 | 23.9                                                 | 0.6 | 0.0543                                                | 0.6  | 263.5 ±1.7                                                |
| 1125-1a_21.2                          | 2.36                                    | 2667       | 931         | 0.36 | 23.4                                                 | 0.6 | 0.0764                                                | 0.5  | 261.5 ±1.5                                                |
| 1125-1a_22.1                          | 0.23                                    | 3484       | 5331        | 1.58 | 23.4                                                 | 0.5 | 0.0549                                                | 1.4  | 268.4 ±1.5                                                |
| 1125-1a_23.1                          | 0.02                                    | 3687       | 6302        | 1.77 | 23.5                                                 | 0.8 | 0.0514                                                | 0.5  | 268.3 ±2.1                                                |
| 1125-1a_24.1                          | 0.33                                    | 1840       | 534         | 0.30 | 24.0                                                 | 0.6 | 0.0555                                                | 0.8  | 262.3 ±1.5                                                |
| <b><i>Quartzofeldspathic dyke</i></b> |                                         |            |             |      |                                                      |     |                                                       |      |                                                           |
| 1125-1b_1.1                           | 3.76                                    | 5092       | 1754        | 0.36 | 29.5                                                 | 0.5 | 0.1030                                                | 0.4  | 200.8 ±1.1                                                |
| 1125-1b_2.1                           | –                                       | 565        | 301         | 0.55 | 26.1                                                 | 0.7 | 0.0510                                                | 1.5  | 242.6 ±1.6                                                |
| 1125-1b_2.2                           | 0.16                                    | 1622       | 1753        | 1.12 | 28.0                                                 | 0.6 | 0.0532                                                | 0.8  | 225.1 ±1.3                                                |
| 1125-1b_3.1                           | 0.04                                    | 2271       | 411         | 0.19 | 25.1                                                 | 1.0 | 0.0527                                                | 0.7  | 251.1 ±2.4                                                |

|              |       |       |      |      |      |     |        |     |       |      |
|--------------|-------|-------|------|------|------|-----|--------|-----|-------|------|
| 1125-1b_3.2  | 0.20  | 1488  | 807  | 0.56 | 25.4 | 0.6 | 0.0509 | 1.0 | 249.0 | ±1.4 |
| 1125-1b_4.1  | 2.82  | 1768  | 874  | 0.51 | 25.3 | 0.8 | 0.0824 | 2.1 | 240.4 | ±1.9 |
| 1125-1b_4.2  | 1.51  | 3323  | 959  | 0.30 | 30.3 | 0.6 | 0.0706 | 0.6 | 204.2 | ±1.1 |
| 1125-1b_5.1  | –     | 245   | 96   | 0.41 | 25.6 | 0.9 | 0.0535 | 2.2 | 246.6 | ±2.2 |
| 1125-1b_5.2  | 3.08  | 1557  | 3004 | 1.99 | 30.8 | 2.1 | 0.0941 | 1.9 | 194.6 | ±4.0 |
| 1125-1b_6.1  | –     | 296   | 151  | 0.53 | 26.8 | 2.2 | 0.0515 | 2.0 | 235.7 | ±5.1 |
| 1125-1b_6.2  | 2.86  | 1293  | 487  | 0.39 | 25.4 | 0.8 | 0.0904 | 0.9 | 237.0 | ±2.0 |
| 1125-1b_7.1  | 45.57 | 5942  | 3407 | 0.59 | 22.3 | 0.5 | 0.4078 | 0.2 | 157.4 | ±0.9 |
| 1125-1b_9.1  | 1.69  | 1649  | 555  | 0.35 | 26.5 | 0.6 | 0.0635 | 0.7 | 234.7 | ±1.3 |
| 1125-1b_9.2  | 0.15  | 1009  | 835  | 0.85 | 28.2 | 0.8 | 0.0526 | 1.1 | 224.0 | ±1.7 |
| 1125-1b_10.1 | 15.56 | 8276  | 3266 | 0.41 | 44.1 | 4.5 | 0.1703 | 0.7 | 122.6 | ±5.5 |
| 1125-1b_11.1 | 0.60  | 2522  | 440  | 0.18 | 26.0 | 0.6 | 0.0560 | 0.6 | 241.4 | ±1.3 |
| 1125-1b_11.2 | 2.77  | 1097  | 268  | 0.25 | 27.0 | 0.6 | 0.0741 | 0.9 | 227.7 | ±1.4 |
| 1125-1b_12.1 | 9.19  | 12176 | 6841 | 0.58 | 70.0 | 0.6 | 0.1262 | 1.7 | 82.4  | ±0.6 |
| 1125-1b_13.1 | 1.11  | 2503  | 1491 | 0.62 | 27.4 | 0.6 | 0.0604 | 1.3 | 228.6 | ±1.5 |
| 1125-1b_13.2 | 1.39  | 330   | 216  | 0.68 | 28.6 | 0.7 | 0.0551 | 1.8 | 220.1 | ±1.6 |
| 1125-1b_14.1 | 0.45  | 2865  | 230  | 0.08 | 27.4 | 0.5 | 0.0551 | 0.6 | 230.1 | ±1.2 |
| 1125-1b_14.2 | 0.47  | 1892  | 228  | 0.12 | 26.9 | 0.6 | 0.0545 | 1.6 | 234.0 | ±1.3 |
| 1125-1b_15.1 | 10.43 | 7678  | 2041 | 0.27 | 39.5 | 0.5 | 0.1326 | 0.3 | 144.5 | ±0.8 |
| 1125-1b_15.2 | 0.07  | 702   | 327  | 0.48 | 24.5 | 0.6 | 0.0513 | 1.2 | 257.7 | ±1.6 |
| 1125-1b_16.1 | 2.83  | 310   | 45   | 0.15 | 26.0 | 1.4 | 0.0770 | 1.5 | 235.4 | ±3.4 |
| 1125-1b_16.2 | 14.76 | 787   | 414  | 0.54 | 23.0 | 0.7 | 0.1672 | 1.4 | 235.1 | ±1.9 |
| 1125-1b_17.1 | 34.62 | 6642  | 710  | 0.11 | 24.5 | 1.8 | 0.3270 | 3.1 | 169.2 | ±4.5 |
| 1125-1b_18.1 | 19.75 | 7285  | 5521 | 0.78 | 39.9 | 2.4 | 0.2069 | 6.6 | 128.1 | ±4.1 |
| 1125-1b_19.1 | 8.11  | 7191  | 2584 | 0.37 | 37.5 | 0.7 | 0.1146 | 1.0 | 156.1 | ±1.1 |
| 1125-1b_20.1 | 25.66 | 7740  | 2798 | 0.37 | 33.1 | 1.5 | 0.2468 | 4.0 | 144.7 | ±3.2 |
| 1125-1b_21.1 | 24.92 | 6401  | 1991 | 0.32 | 38.5 | 4.2 | 0.2392 | 1.7 | 126.0 | ±5.3 |
| 1125-1b_8.2  | 0.45  | 1969  | 805  | 0.42 | 28.5 | 1.8 | 0.0550 | 0.8 | 220.8 | ±3.9 |
| 1125-1b_22.1 | 12.82 | 4371  | 632  | 0.15 | 22.6 | 1.2 | 0.1440 | 0.4 | 247.8 | ±2.9 |
| 1125-1b_23.1 | 17.04 | 7550  | 3697 | 0.51 | 45.4 | 1.1 | 0.1820 | 3.5 | 117.0 | ±1.7 |
| 1125-1b_24.1 | 9.35  | 7829  | 2672 | 0.35 | 42.9 | 0.5 | 0.1224 | 1.0 | 134.9 | ±0.7 |
| 1125-1b_25.1 | 6.05  | 3591  | 495  | 0.14 | 26.9 | 1.3 | 0.0903 | 0.5 | 223.7 | ±2.9 |
| 1125-1b_26.1 | 0.23  | 556   | 456  | 0.85 | 25.9 | 0.7 | 0.0512 | 1.3 | 244.0 | ±1.6 |
| 1125-1b_26.2 | 8.31  | 3210  | 986  | 0.32 | 28.4 | 2.0 | 0.1192 | 0.7 | 204.5 | ±4.0 |
| 1125-1b_27.1 | 0.61  | 971   | 1528 | 1.63 | 27.9 | 1.8 | 0.0575 | 0.9 | 225.2 | ±4.0 |
| 1125-1b_28.1 | 42.35 | 8406  | 3859 | 0.47 | 28.5 | 2.2 | 0.3945 | 0.1 | 126.6 | ±2.8 |
| 1125-1b_29.1 | 1.57  | 5004  | 958  | 0.20 | 32.1 | 3.3 | 0.0600 | 2.5 | 195.2 | ±6.4 |
| 1125-1b_29.2 | 0.28  | 165   | 102  | 0.64 | 24.9 | 0.9 | 0.0510 | 2.4 | 253.9 | ±2.3 |
| 1125-1b_30.1 | 29.86 | 8147  | 3226 | 0.41 | 36.1 | 1.1 | 0.2850 | 1.0 | 124.2 | ±1.5 |
| 0619-2_81.1  | 0.36  | 6163  | 1162 | 0.19 | 24.6 | 0.9 | 0.0543 | 0.4 | 255.7 | ±2.2 |
| 0619-2_81.2  | 5.18  | 3523  | 1270 | 0.37 | 27.9 | 1.0 | 0.0938 | 2.6 | 215.3 | ±2.3 |
| 0619-2_82.1  | 6.31  | 8656  | 1721 | 0.21 | 48.1 | 1.0 | 0.1029 | 1.2 | 123.7 | ±1.3 |
| 0619-2_83.1  | 10.62 | 7514  | 1533 | 0.21 | 26.1 | 2.3 | 0.1402 | 4.9 | 216.3 | ±5.3 |

|              |       |       |      |      |      |     |        |     |       |      |
|--------------|-------|-------|------|------|------|-----|--------|-----|-------|------|
| 0619-2_84.1  | 12.80 | 8157  | 2291 | 0.29 | 37.2 | 1.1 | 0.1469 | 6.3 | 149.8 | ±2.5 |
| 0619-2_85.1  | 23.52 | 10315 | 5719 | 0.57 | 50.4 | 1.1 | 0.2572 | 1.0 | 95.3  | ±1.1 |
| 0619-2_86.1  | 9.80  | 7915  | 1283 | 0.17 | 38.1 | 1.0 | 0.1261 | 1.8 | 150.9 | ±1.6 |
| 0619-2_87.1  | 2.62  | 9773  | 1124 | 0.12 | 42.8 | 1.9 | 0.0722 | 0.5 | 144.7 | ±2.7 |
| 0619-2_88.1  | 1.80  | 1879  | 449  | 0.25 | 27.6 | 1.1 | 0.0659 | 0.9 | 225.2 | ±2.4 |
| 0619-2_89.1  | 6.75  | 5657  | 2112 | 0.39 | 44.0 | 1.8 | 0.1071 | 0.9 | 134.4 | ±2.5 |
| 0619-2_90.1  | 22.22 | 7002  | 2866 | 0.42 | 37.4 | 1.9 | 0.2261 | 3.3 | 132.7 | ±3.0 |
| 0619-2_91.1  | 0.32  | 1486  | 124  | 0.09 | 24.5 | 1.1 | 0.0536 | 1.0 | 257.0 | ±2.8 |
| 0619-2_92.1  | 1.10  | 4209  | 715  | 0.18 | 24.2 | 1.1 | 0.0585 | 1.5 | 258.5 | ±2.8 |
| 0619-2_93.1  | 12.04 | 4540  | 708  | 0.16 | 26.1 | 1.1 | 0.1512 | 0.5 | 213.0 | ±2.3 |
| 0619-2_94.1  | 9.21  | 4428  | 1473 | 0.34 | 38.3 | 1.1 | 0.1229 | 6.3 | 150.8 | ±2.3 |
| 0619-2_95.1  | 2.36  | 7685  | 1267 | 0.17 | 40.9 | 1.1 | 0.0705 | 0.5 | 151.7 | ±1.6 |
| 0619-2_96.1  | 0.10  | 6742  | 750  | 0.11 | 23.7 | 1.1 | 0.0524 | 0.5 | 265.8 | ±2.8 |
| 0619-2_97.1  | 8.84  | 2729  | 707  | 0.27 | 24.4 | 1.1 | 0.1225 | 1.6 | 235.8 | ±2.6 |
| 0619-2_98.1  | 0.47  | 3561  | 536  | 0.16 | 27.5 | 1.1 | 0.0539 | 0.7 | 229.0 | ±2.5 |
| 0619-2_99.1  | 0.83  | 3750  | 349  | 0.10 | 25.5 | 1.1 | 0.0579 | 0.7 | 245.5 | ±2.6 |
| 0619-2_100.1 | 19.80 | 7110  | 1421 | 0.21 | 30.6 | 1.2 | 0.2030 | 4.9 | 167.2 | ±3.3 |
| 0619-2_100.2 | 7.11  | 7073  | 1236 | 0.18 | 39.9 | 1.1 | 0.1062 | 1.2 | 148.4 | ±1.7 |
| 0619-2_101.1 | 25.85 | 16862 | 4640 | 0.28 | 52.3 | 1.1 | 0.2516 | 4.3 | 91.0  | ±1.9 |
| 0619-2_101.2 | 0.45  | 970   | 455  | 0.48 | 24.9 | 1.1 | 0.0538 | 1.3 | 252.6 | ±2.8 |
| 0619-2_102.1 | 1.41  | 4991  | 1005 | 0.21 | 29.3 | 1.1 | 0.0621 | 2.5 | 213.1 | ±2.4 |
| 0619-2_1.3   | 0.65  | 6555  | 1802 | 0.28 | 31.1 | 1.1 | 0.0568 | 0.6 | 202.3 | ±2.2 |

***Onjeongri granodiorite***

|             |      |      |      |      |      |     |        |     |        |                   |
|-------------|------|------|------|------|------|-----|--------|-----|--------|-------------------|
| 0423-3-4.1  | 2.36 | 204  | 140  | 0.71 | 76.4 | 4.2 | 0.0496 | 5.1 | 83.6   | ±3.5              |
| 0423-3-5.1  | 1.11 | 228  | 148  | 0.67 | 80.3 | 1.7 | 0.0500 | 5.0 | 79.5   | ±1.4              |
| 0423-3-6.1  | 0.73 | 341  | 192  | 0.58 | 76.1 | 2.2 | 0.0495 | 3.9 | 84.0   | ±1.8              |
| 0423-3-7.1  | 0.71 | 121  | 74   | 0.63 | 75.7 | 1.9 | 0.0479 | 7.2 | 84.6   | ±1.6              |
| 0423-3-8.1  | –    | 251  | 219  | 0.90 | 78.8 | 2.2 | 0.0518 | 4.6 | 80.9   | ±1.8              |
| 0423-3-9.1  | –    | 178  | 112  | 0.65 | 75.1 | 2.7 | 0.0473 | 5.7 | 85.3   | ±2.3              |
| 0423-3-10.1 | –    | 1204 | 81   | 0.07 | 3.3  | 1.7 | 0.1121 | 0.3 | 1834.2 | ±5.4 <sup>†</sup> |
| 0423-3-10.2 | 0.61 | 123  | 79   | 0.66 | 79.3 | 2.5 | 0.0524 | 6.2 | 80.3   | ±2.0              |
| 0423-3-11.1 | 1.64 | 260  | 217  | 0.86 | 76.3 | 1.7 | 0.0498 | 4.6 | 83.7   | ±1.5              |
| 0423-3-12.1 | –    | 266  | 166  | 0.64 | 74.9 | 2.2 | 0.0481 | 4.6 | 85.5   | ±1.9              |
| 0423-3-13.1 | 0.28 | 299  | 183  | 0.63 | 78.4 | 2.1 | 0.0471 | 4.3 | 81.7   | ±1.7              |
| 0423-3-14.1 | 1.51 | 282  | 200  | 0.73 | 75.2 | 1.7 | 0.0486 | 4.4 | 85.0   | ±1.4              |
| 0423-3-15.1 | 0.48 | 1190 | 2419 | 2.10 | 75.4 | 1.7 | 0.0475 | 2.0 | 85.0   | ±1.4              |
| 0423-3-15.2 | 0.54 | 1837 | 1800 | 1.01 | 74.3 | 1.8 | 0.0581 | 4.3 | 85.0   | ±1.6              |
| 0423-3-16.1 | –    | 164  | 103  | 0.65 | 70.3 | 1.8 | 0.0451 | 6.2 | 91.3   | ±1.7              |

1. Common lead fractions based on <sup>204</sup>Pb counts.

2. Measured data uncorrected for common lead. Errors are at 1σ level.

3. <sup>206</sup>Pb/<sup>238</sup>U ages corrected by assuming <sup>206</sup>Pb/<sup>238</sup>U-<sup>207</sup>Pb/<sup>235</sup>U age-concordance.

† <sup>204</sup>Pb corrected <sup>207</sup>Pb/<sup>206</sup>Pb age for older than 1000 Ma.

–: not detected
